# Supplementary material for: Effect of substituent and solvent on cation–π interactions in benzene and borazine: a computational study
Source: Royal Society of Chemistry journal article supplement (doi:10.1039/c3dt52081a), 2013-10-09
Supplement: c3dt52081a.pdf [file c3dt52081a.pdf]

**Supporting Information**

**Effect of Substituent and Solvent on Cation- $\pi$  Interaction in Benzene and Borazine: A Computational Study**

**Kusum K. Bania\*<sup>a</sup> Ankur Kanti Guha\*<sup>b</sup>, Pradip Kr. Bhattacharyya\*<sup>c</sup> and Sourab Sinha<sup>c</sup>**

**<sup>a</sup>Tezpur University, Napaam, Assam India, 784028,**

**<sup>b</sup>Dibrugarh University, Dibrugarh, Assam, India, 786004,**

**<sup>c</sup>Arya Vidyapeeth College, Guwahati, Assam, India, 781016.**

**Table S1.**  $\Delta E_{\text{BSSE}}$  corrections at B3LYP and MP2 level calculation in gas phase

|                                                            | B3LYP     |              |               | MP2       |              |               |
|------------------------------------------------------------|-----------|--------------|---------------|-----------|--------------|---------------|
|                                                            | 6-31+G(d) | 6-31++G(d,p) | 6-311++G(d,p) | 6-31+G(d) | 6-31++G(d,p) | 6-311++G(d,p) |
| Benzene -Li <sup>+</sup>                                   | 0.51      | 0.57         | 0.56          | 4.47      | 4.27         | 3.90          |
| Benzene -Na <sup>+</sup>                                   | 0.40      | 0.50         | 0.72          | 3.78      | 3.70         | 2.99          |
| Benzene -K <sup>+</sup>                                    | 0.29      | 0.3          | 0.32          | 2.33      | 2.62         | 2.17          |
| Benzene-(CH <sub>3</sub> ) <sub>3</sub> -Li <sup>+</sup>   | 0.45      | 0.57         | 0.32          | 2.11      | 2.94         | 2.51          |
| Benzene-(CH <sub>3</sub> ) <sub>3</sub> -Na <sup>+</sup>   | 0.78      | 0.78         | 0.84          | 4.06      | 3.68         | 2.88          |
| Benzene -(CH <sub>3</sub> ) <sub>3</sub> -K <sup>+</sup>   | 0.49      | 0.49         | 0.37          | 3.75      | 3.77         | 2.43          |
| Benzene-(NH <sub>2</sub> ) <sub>3</sub> -Li <sup>+</sup>   | 0.75      | 0.74         | 0.69          | 4.24      | 3.90         | 3.65          |
| Benzene-(NH <sub>2</sub> ) <sub>3</sub> -Na <sup>+</sup>   | 0.88      | 0.97         | 0.89          | 3.84      | 3.59         | 2.91          |
| Benzene -(NH <sub>2</sub> ) <sub>3</sub> -K <sup>+</sup>   | 0.64      | 0.68         | 0.41          | 4.29      | 4.48         | 2.50          |
| Borazine -Li <sup>+</sup>                                  | 0.62      | 0.56         | 0.40          | 3.17      | 2.84         | 2.22          |
| Borazine -Na <sup>+</sup>                                  | 0.56      | 0.58         | 0.55          | 2.98      | 2.68         | 1.63          |
| Borazine -K <sup>+</sup>                                   | 0.37      | 0.37         | 0.16          | 2.66      | 2.83         | 1.56          |
| Borazine-(CH <sub>3</sub> ) <sub>3</sub> -Li <sup>+</sup>  | 0.73      | 0.65         | 0.46          | 3.38      | 2.97         | 2.76          |
| Borazine-(CH <sub>3</sub> ) <sub>3</sub> -Na <sup>+</sup>  | 0.82      | 0.77         | 0.70          | 3.48      | 3.12         | 2.13          |
| Borazine -(CH <sub>3</sub> ) <sub>3</sub> -K <sup>+</sup>  | 0.61      | 0.64         | 0.23          | 4.21      | 4.68         | 2.25          |
| Borazine -(NH <sub>2</sub> ) <sub>3</sub> -Li <sup>+</sup> | 0.93      | 0.78         | 0.66          | 3.51      | 3.12         | 2.86          |
| Borazine-(NH <sub>2</sub> ) <sub>3</sub> -Na <sup>+</sup>  | 1.02      | 0.94         | 0.82          | 3.70      | 3.24         | 2.28          |
| Borazine -(NH <sub>2</sub> ) <sub>3</sub> -K <sup>+</sup>  | 0.63      | 0.62         | 0.25          | 4.19      | 4.50         | 2.26          |
| Borazine -(NO <sub>2</sub> ) <sub>3</sub> -Li <sup>+</sup> | 0.64      | 0.61         | 0.46          | 2.93      | 2.80         | 2.00          |
| Borazine-(NO <sub>2</sub> ) <sub>3</sub> -Na <sup>+</sup>  | 0.63      | 0.59         | 0.63          | 2.14      | 2.08         | 1.69          |
| Borazine -(NO <sub>2</sub> ) <sub>3</sub> -K <sup>+</sup>  | 0.44      | 0.46         | 0.31          | 2.93      | 3.02         | 1.85          |

**Table S2.** BSSE corrected cation- $\pi$  interaction energy (in kcal/mol) of borazine and their substituted derivatives in different solvent medium at B3LYP/6-31++G(d,p) level of calculation.

| Compounds                                                  | Interaction Energy, $\Delta E$ |         |       |
|------------------------------------------------------------|--------------------------------|---------|-------|
|                                                            | Benzene                        | Acetone | Water |
| Borazine -Li <sup>+</sup>                                  | -0.95                          | 15.26   | 16.43 |
| Borazine -Na <sup>+</sup>                                  | -1.18                          | 7.80    | 8.39  |
| Borazine -K <sup>+</sup>                                   | -1.56                          | 3.51    | 3.84  |
| Borazine-(CH <sub>3</sub> ) <sub>3</sub> -Li <sup>+</sup>  | -6.36                          | 12.79   | 14.24 |
| Borazine-(CH <sub>3</sub> ) <sub>3</sub> -Na <sup>+</sup>  | -4.61                          | 6.58    | 7.36  |
| Borazine -(CH <sub>3</sub> ) <sub>3</sub> -K <sup>+</sup>  | -2.75                          | 4.25    | 4.75  |
| Borazine -(NH <sub>2</sub> ) <sub>3</sub> -Li <sup>+</sup> | -15.54                         | 8.79    | 10.90 |
| Borazine-(NH <sub>2</sub> ) <sub>3</sub> -Na <sup>+</sup>  | -12.47                         | 3.92    | 5.36  |
| Borazine -(NH <sub>2</sub> ) <sub>3</sub> -K <sup>+</sup>  | -10.64                         | 0.72    | 1.77  |
| Borazine -(NO <sub>2</sub> ) <sub>3</sub> -Li <sup>+</sup> | 24.87                          | 26.17   | 25.47 |
| Borazine-(NO <sub>2</sub> ) <sub>3</sub> -Na <sup>+</sup>  | 19.74                          | 15.91   | 14.90 |
| Borazine -(NO <sub>2</sub> ) <sub>3</sub> -K <sup>+</sup>  | 15.43                          | 10.95   | 10.09 |

**Table S3.** Correlation values ( $R^2$ ) between Hammett constant ( $\sigma_m$ ,  $\sigma_p$  and  $\Sigma\sigma_m+\sigma_p$ ) and interaction energies ( $\Delta E$ ). The values of Hammett constants are taken from ref (45). and those of interaction energies

| Cation-pi<br>Complexes   | Substit<br>-uents | $\sigma_m$ | $\sigma_p$ | $\Sigma\sigma_m+\sigma_p$ | $R^2$ values for plot of $\Delta E$ against |            |                           |            |            |                           |            |            |                           |            |            |                           |
|--------------------------|-------------------|------------|------------|---------------------------|---------------------------------------------|------------|---------------------------|------------|------------|---------------------------|------------|------------|---------------------------|------------|------------|---------------------------|
|                          |                   |            |            |                           | Gas                                         |            |                           | Benzene    |            |                           | Acetone    |            |                           | Water      |            |                           |
|                          |                   |            |            |                           | $\sigma_m$                                  | $\sigma_p$ | $\Sigma\sigma_m+\sigma_p$ | $\sigma_m$ | $\sigma_p$ | $\Sigma\sigma_m+\sigma_p$ | $\sigma_m$ | $\sigma_p$ | $\Sigma\sigma_m+\sigma_p$ | $\sigma_m$ | $\sigma_p$ | $\Sigma\sigma_m+\sigma_p$ |
| Borazine-Li <sup>+</sup> | CH <sub>3</sub>   | -0.07      | -0.17      | -0.24                     | 0.98                                        | 0.98       | 1                         | 0.98       | 0.98       | 0.99                      | 0.98       | 0.94       | 0.99                      | 0.99       | 0.97       | 0.99                      |
| Borazine-Na <sup>+</sup> | NH <sub>2</sub>   | -0.16      | -0.66      | -0.82                     | 0.97                                        | 0.99       | 0.99                      | 0.98       | 0.99       | 1                         | 0.99       | 0.97       | 0.98                      | 0.99       | 0.96       | 0.99                      |
| Borazine-K <sup>+</sup>  | NO <sub>2</sub>   | 0.71       | 0.78       | 1.49                      | 0.96                                        | 0.99       | 0.99                      | 0.03       | 0.00       | 0.00                      | 0.99       | 0.98       | 0.99                      | 0.99       | 0.96       | 0.99                      |

**Table S4.** NICS values of the cationic complexes of benzene and substituted benzene.

| Compound                                                 | NICS(0) | NICS(1) |
|----------------------------------------------------------|---------|---------|
| Benzene                                                  | -7.9    | -10.1   |
| Benzene-Li <sup>+</sup>                                  | -7.5    | -9.8    |
| Benzene-Na <sup>+</sup>                                  | -6.4    | -9.7    |
| Benzene-K <sup>+</sup>                                   | -7.4    | -10.1   |
| Benzene-(CH <sub>3</sub> ) <sub>3</sub>                  | -8.1    | -9.4    |
| Benzene-(CH <sub>3</sub> ) <sub>3</sub> -Li <sup>+</sup> | -7.7    | -9.1    |
| Benzene-(CH <sub>3</sub> ) <sub>3</sub> -Na <sup>+</sup> | -6.2    | -8.9    |
| Benzene-(CH <sub>3</sub> ) <sub>3</sub> -K <sup>+</sup>  | -6.9    | -8.9    |
| Benzene-(NH <sub>2</sub> ) <sub>3</sub>                  | -7.1    | -6.7    |
| Benzene-(NH <sub>2</sub> ) <sub>3</sub> -Li <sup>+</sup> | -6.1    | -5.6    |
| Benzene-(NH <sub>2</sub> ) <sub>3</sub> -Na <sup>+</sup> | -5.0    | -5.4    |
| Benzene-(NH <sub>2</sub> ) <sub>3</sub> -K <sup>+</sup>  | -6.2    | -5.9    |

**Table S5.** Counterpoised corrected interaction energy of borazine dimer, H<sub>2</sub>O linked borazine and its substituted compounds, and M- $\pi$ - $\pi$  (M= Li<sup>+</sup>, Na<sup>+</sup>, K<sup>+</sup>) complexes of borazine.

| Compounds                                                                                            | $\Delta E_{\text{int}}$ | $\Delta E_{\text{BSSE}}$ |
|------------------------------------------------------------------------------------------------------|-------------------------|--------------------------|
| Borazine-Borazine                                                                                    | -0.5896                 | 0.42079                  |
| Borazine-(CH <sub>3</sub> ) <sub>3</sub> -H <sub>2</sub> O- Borazine-(CH <sub>3</sub> ) <sub>3</sub> | -3.8730                 | 2.31921                  |
| Borazine-(CH <sub>3</sub> ) <sub>3</sub> -H <sub>2</sub> O- Borazine-(CH <sub>3</sub> ) <sub>3</sub> | -12.1114                | 1.67072                  |
| Li <sup>+</sup> -Borazine-Borazine                                                                   | -32.7670                | 1.18913                  |
| Na <sup>+</sup> -Borazine-Borazine                                                                   | -20.5961                | 1.30425                  |
| K <sup>+</sup> -Borazine-Borazine                                                                    | -12.7279                | 0.85684                  |

**Table S6.** Chemical hardness ( $\eta$ , in a.u.), chemical potential ( $\mu$  in a.u.) and electrophilicity index ( $\omega$ ) of benzene, borazine and their substituted derivatives in gas phase calculated at B3LYP/6-31++G (d,p).

| Compounds                                                    | $\eta$ | $\mu$  | $\omega$ | Compounds                                                     | $\eta$ | $\mu$  | $\omega$ |
|--------------------------------------------------------------|--------|--------|----------|---------------------------------------------------------------|--------|--------|----------|
| 1.Benzene                                                    | 0.121  | -0.136 | 0.077    | 1.Borazine                                                    | 0.140  | -0.147 | 0.077    |
| 2.Benzene -Li <sup>+</sup>                                   | 0.125  | -0.336 | 0.451    | 2.Borazine -Li <sup>+</sup>                                   | 0.147  | -0.340 | 0.393    |
| 3.Benzene -Na <sup>+</sup>                                   | 0.114  | -0.320 | 0.445    | 3.Borazine -Na <sup>+</sup>                                   | 0.127  | -0.335 | 0.440    |
| 4.Benzene -K <sup>+</sup>                                    | 0.114  | -0.300 | 0.392    | 4.Borazine -K <sup>+</sup>                                    | 0.127  | -0.315 | 0.389    |
| 5.Benzene-(CH <sub>3</sub> ) <sub>3</sub>                    | 0.122  | -0.113 | 0.053    | 5.Borazine-(CH <sub>3</sub> ) <sub>3</sub>                    | 0.127  | -0.143 | 0.080    |
| 6.Benzene -(CH <sub>3</sub> ) <sub>3</sub> -Li <sup>+</sup>  | 0.117  | -0.305 | 0.396    | 6.Borazine -(CH <sub>3</sub> ) <sub>3</sub> -Li <sup>+</sup>  | 0.138  | -0.319 | 0.368    |
| 7.Benzene -(CH <sub>3</sub> ) <sub>3</sub> -Na <sup>+</sup>  | 0.102  | -0.298 | 0.435    | 7.Borazine -(CH <sub>3</sub> ) <sub>3</sub> -Na <sup>+</sup>  | 0.120  | -0.316 | 0.416    |
| 8.Benzene -(CH <sub>3</sub> ) <sub>3</sub> -K <sup>+</sup>   | 0.101  | -0.284 | 0.398    | 8.Borazine -(CH <sub>3</sub> ) <sub>3</sub> -K <sup>+</sup>   | 0.122  | -0.299 | 0.365    |
| 9.Benzene -(NH <sub>2</sub> ) <sub>3</sub>                   | 0.090  | -0.104 | 0.060    | 9.Borazine -(NH <sub>2</sub> ) <sub>3</sub>                   | 0.102  | -0.268 | 0.350    |
| 10.Benzene -(NH <sub>2</sub> ) <sub>3</sub> -Li <sup>+</sup> | 0.100  | -0.265 | 0.349    | 10.Borazine -(NH <sub>2</sub> ) <sub>3</sub> -Li <sup>+</sup> | 0.115  | -0.281 | 0.343    |
| 11.Benzene-(NH <sub>2</sub> ) <sub>3</sub> -Na <sup>+</sup>  | 0.084  | -0.265 | 0.416    | 11.Borazine -(NH <sub>2</sub> ) <sub>3</sub> -Na <sup>+</sup> | 0.101  | -0.281 | 0.390    |
| 12.Benzene -(NH <sub>2</sub> ) <sub>3</sub> -K <sup>+</sup>  | 0.087  | -0.250 | 0.360    | 12.Borazine -(NH <sub>2</sub> ) <sub>3</sub> -K <sup>+</sup>  | 0.102  | -0.268 | 0.350    |
|                                                              |        |        |          | 13. Borazine-(NO <sub>2</sub> ) <sub>3</sub>                  | 0.095  | -0.241 | 0.305    |
|                                                              |        |        |          | 14.Borazine -(NO <sub>2</sub> ) <sub>3</sub> -Li <sup>+</sup> | 0.087  | -0.369 | 0.778    |
|                                                              |        |        |          | 15.Borazine -(NO <sub>2</sub> ) <sub>3</sub> -Na <sup>+</sup> | 0.087  | -0.379 | 0.820    |
|                                                              |        |        |          | 16.Borazine -(NO <sub>2</sub> ) <sub>3</sub> -K <sup>+</sup>  | 0.088  | -0.358 | 0.723    |

**Table S7.** Chemical hardness ( $\eta$ , in a.u.), chemical potential ( $\mu$  in a.u.) and electrophilicity index ( $\omega$ ) of benzene, borazine and their substituted derivatives in gas phase calculated at B3LYP/6-311++G (d,p).

| Compounds                                                        | $\eta$ | $\mu$  | $\omega$ | Compounds                                                     | $\eta$ | $\mu$  | $\omega$ |
|------------------------------------------------------------------|--------|--------|----------|---------------------------------------------------------------|--------|--------|----------|
| 1.Benzene                                                        | 0.121  | -0.135 | 0.075    | 1.Borazine                                                    | 0.143  | -0.143 | 0.072    |
| 2.Benzene -Li <sup>+</sup>                                       | 0.117  | -0.307 | 0.402    | 2.Borazine -Li <sup>+</sup>                                   | 0.147  | -0.340 | 0.392    |
| 3.Benzene -Na <sup>+</sup>                                       | 0.102  | -0.300 | 0.438    | 3.Borazine -Na <sup>+</sup>                                   | 0.127  | -0.335 | 0.439    |
| 4.Benzene -K <sup>+</sup>                                        | 0.103  | -0.284 | 0.393    | 4.Borazine -K <sup>+</sup>                                    | 0.127  | -0.314 | 0.389    |
| 5.Benzene-(CH <sub>3</sub> ) <sub>3</sub>                        | 0.114  | -0.121 | 0.064    | 5.Borazine-(CH <sub>3</sub> ) <sub>3</sub>                    | 0.127  | -0.142 | 0.079    |
| 6.Benzene -(CH <sub>3</sub> ) <sub>3</sub> -Li <sup>+</sup>      | 0.125  | -0.339 | 0.459    | 6.Borazine -(CH <sub>3</sub> ) <sub>3</sub> -Li <sup>+</sup>  | 0.138  | -0.319 | 0.368    |
| 7.Benzene -(CH <sub>3</sub> ) <sub>3</sub> -Na <sup>+</sup>      | 0.111  | -0.322 | 0.451    | 7.Borazine -(CH <sub>3</sub> ) <sub>3</sub> -Na <sup>+</sup>  | 0.120  | -0.316 | 0.416    |
| 8.Benzene -(CH <sub>3</sub> ) <sub>3</sub> -K <sup>+</sup>       | 0.116  | -0.300 | 0.387    | 8.Borazine -(CH <sub>3</sub> ) <sub>3</sub> -K <sup>+</sup>   | 0.122  | -0.299 | 0.365    |
| 9.Benzene -(NH <sub>2</sub> ) <sub>3</sub>                       | 0.095  | -0.098 | 0.051    | 9.Borazine -(NH <sub>2</sub> ) <sub>3</sub>                   | 0.102  | -0.267 | 0.349    |
| 10.Benzene -(NH <sub>2</sub> ) <sub>3</sub> -<br>Li <sup>+</sup> | 0.102  | -0.265 | 0.346    | 10.Borazine -(NH <sub>2</sub> ) <sub>3</sub> -Li <sup>+</sup> | 0.115  | -0.280 | 0.343    |
| 11.Benzene-(NH <sub>2</sub> ) <sub>3</sub> -<br>Na <sup>+</sup>  | 0.084  | -0.266 | 0.419    | 11.Borazine -(NH <sub>2</sub> ) <sub>3</sub> -Na <sup>+</sup> | 0.101  | -0.281 | 0.389    |
| 12.Benzene -(NH <sub>2</sub> ) <sub>3</sub> -K <sup>+</sup>      | 0.089  | -0.251 | 0.354    | 12.Borazine -(NH <sub>2</sub> ) <sub>3</sub> -K <sup>+</sup>  | 0.102  | -0.267 | 0.349    |
|                                                                  |        |        |          | 13. Borazine-(NO <sub>2</sub> ) <sub>3</sub>                  | 0.095  | -0.240 | 0.305    |
|                                                                  |        |        |          | 14.Borazine -(NO <sub>2</sub> ) <sub>3</sub> -Li <sup>+</sup> | 0.087  | -0.369 | 0.777    |
|                                                                  |        |        |          | 15.Borazine -(NO <sub>2</sub> ) <sub>3</sub> -Na <sup>+</sup> | 0.087  | -0.379 | 0.819    |
|                                                                  |        |        |          | 16.Borazine -(NO <sub>2</sub> ) <sub>3</sub> -K <sup>+</sup>  | 0.088  | -0.358 | 0.723    |



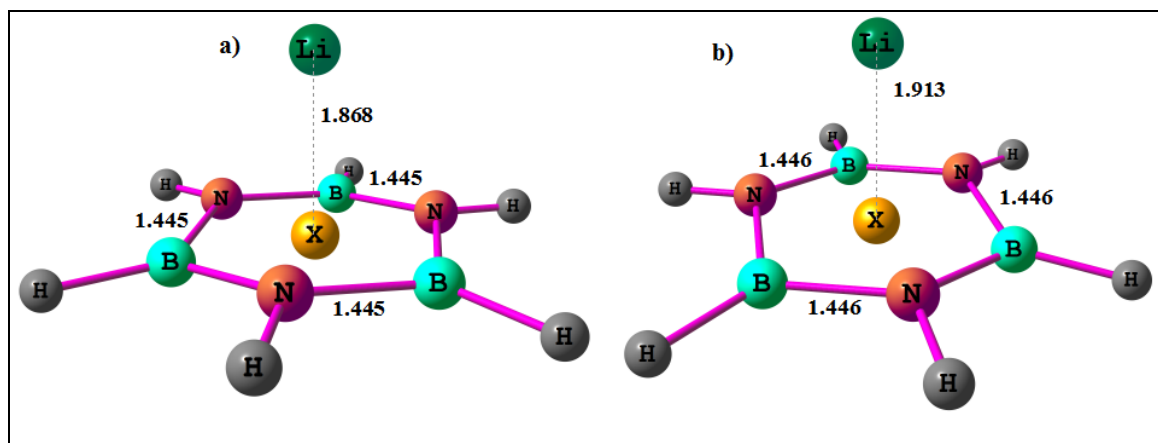

**Figure S1.** Optimized geometry of  $B_3N_3H_6-Li^+$  complex at a) MP2/Aug-ccPVTZ and b) MP2/TZVP level of theory.

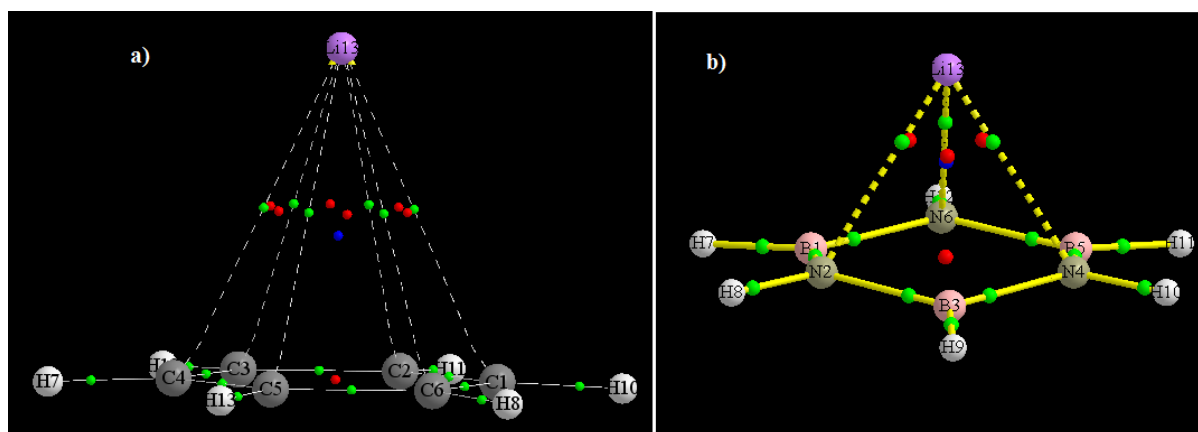

**Figure S2.** Molecular graph of (a) benzene-Li<sup>+</sup> and (b) borazine-Li<sup>+</sup> complex.

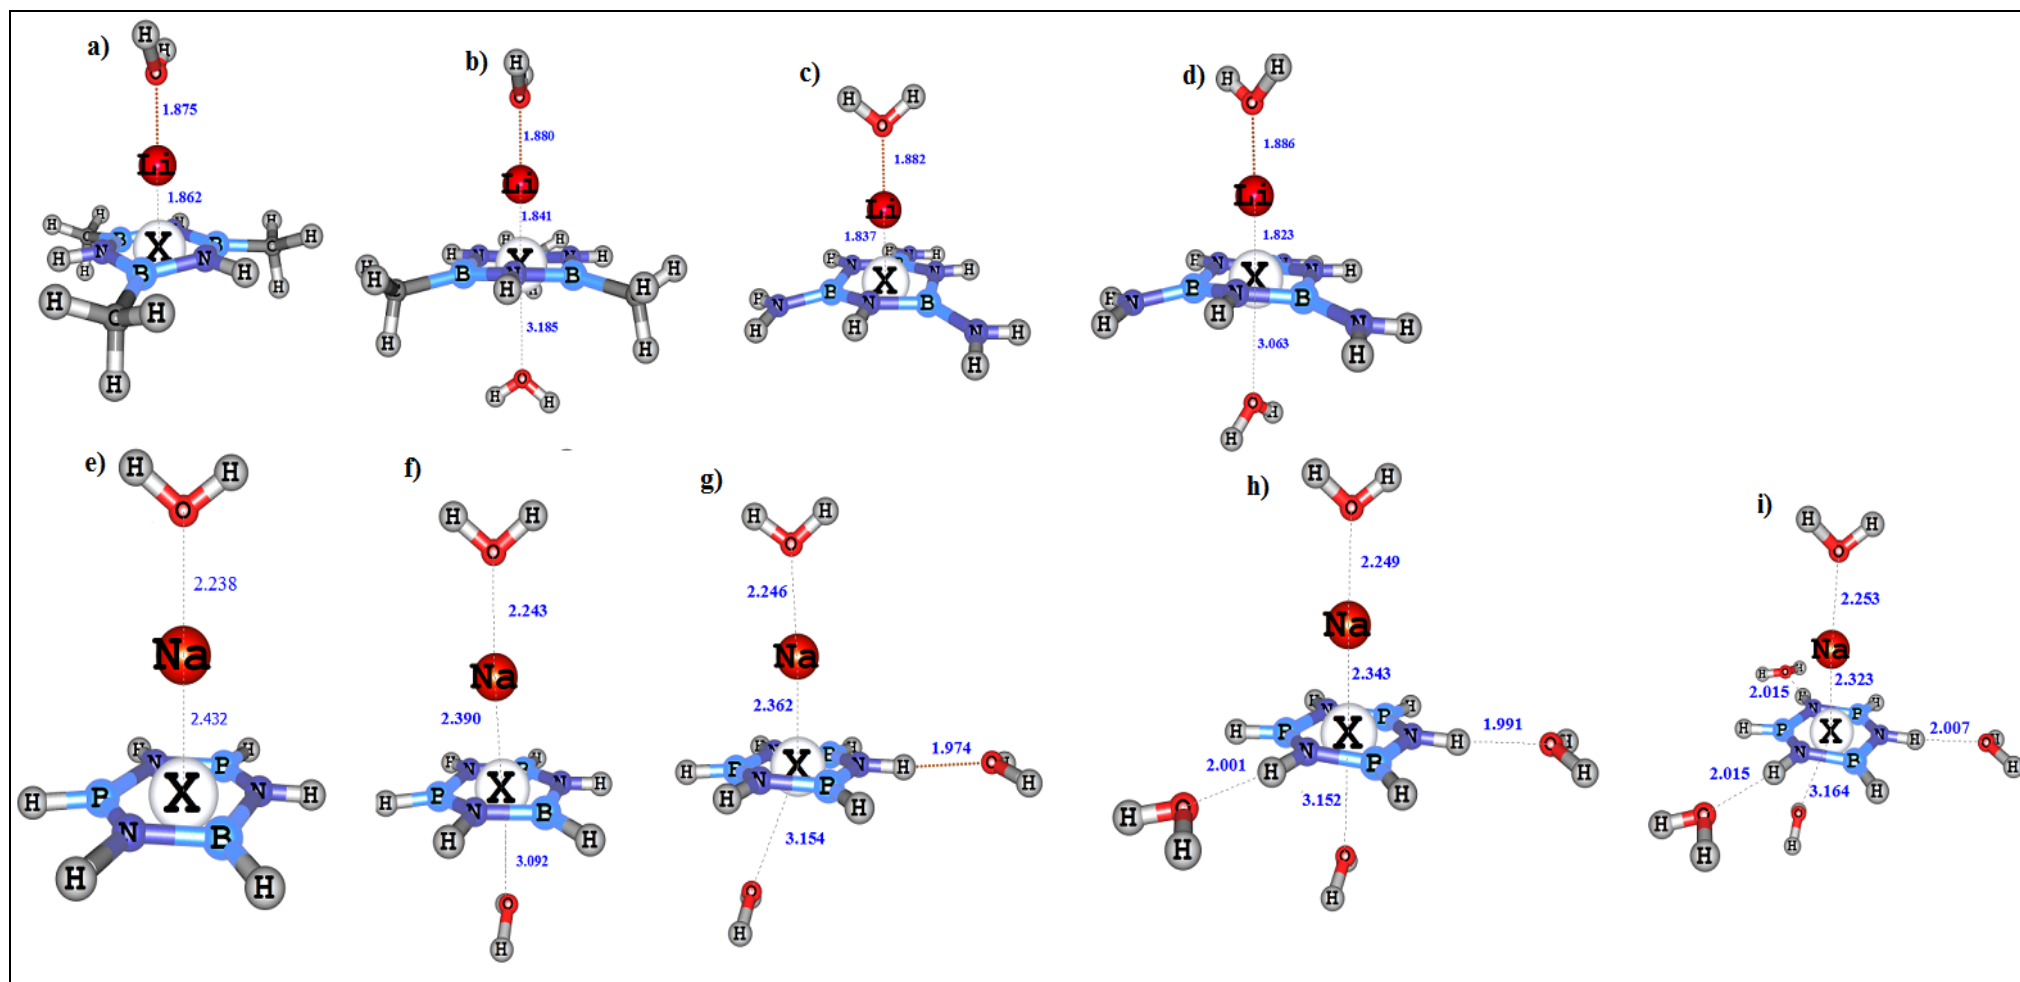

**Figure S3.** Optimized geometry of a) Borazine (CH<sub>3</sub>)<sub>3</sub>-Li<sup>+</sup>-π-W b) Borazine (CH<sub>3</sub>)<sub>3</sub>-Li<sup>+</sup>-π-2W c) Borazine (NH<sub>2</sub>)<sub>3</sub>-Li<sup>+</sup>-π-W d) Borazine (NH<sub>2</sub>)<sub>3</sub>-Li<sup>+</sup>-π-2W e) Borazine-Na<sup>+</sup>-π-W f) Borazine-Na<sup>+</sup>-π-2W g) Borazine-Na<sup>+</sup>-π-3W h) Borazine-Na<sup>+</sup>-π-4W i) Borazine-Na<sup>+</sup>-π-5W.

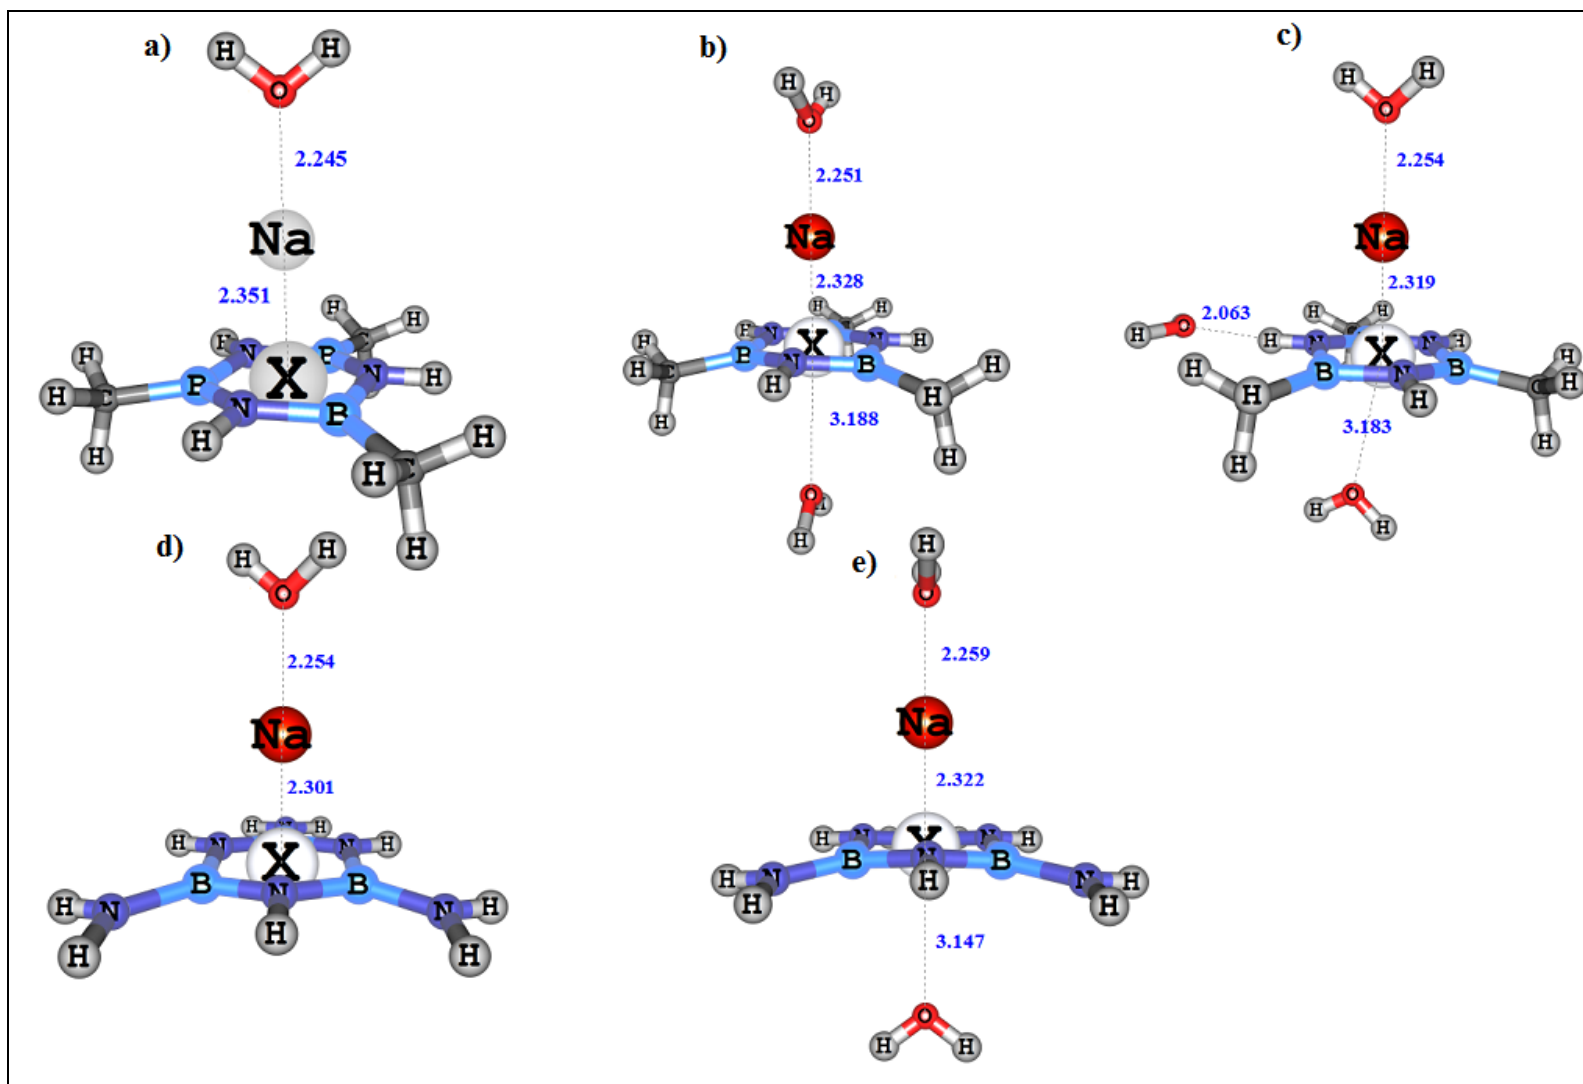

**Figure S4.** Optimized geometry of a) Borazine (CH<sub>3</sub>)<sub>3</sub>-Na<sup>+</sup>-π-W b) Borazine (CH<sub>3</sub>)<sub>3</sub>-Na<sup>+</sup>-π-2W c) Borazine (CH<sub>3</sub>)<sub>3</sub>-Na<sup>+</sup>-3π-W d) Borazine (NH<sub>2</sub>)<sub>3</sub>-Na<sup>+</sup>-π-W e) Borazine (NH<sub>2</sub>)<sub>3</sub>-Na<sup>+</sup>-π-2W.

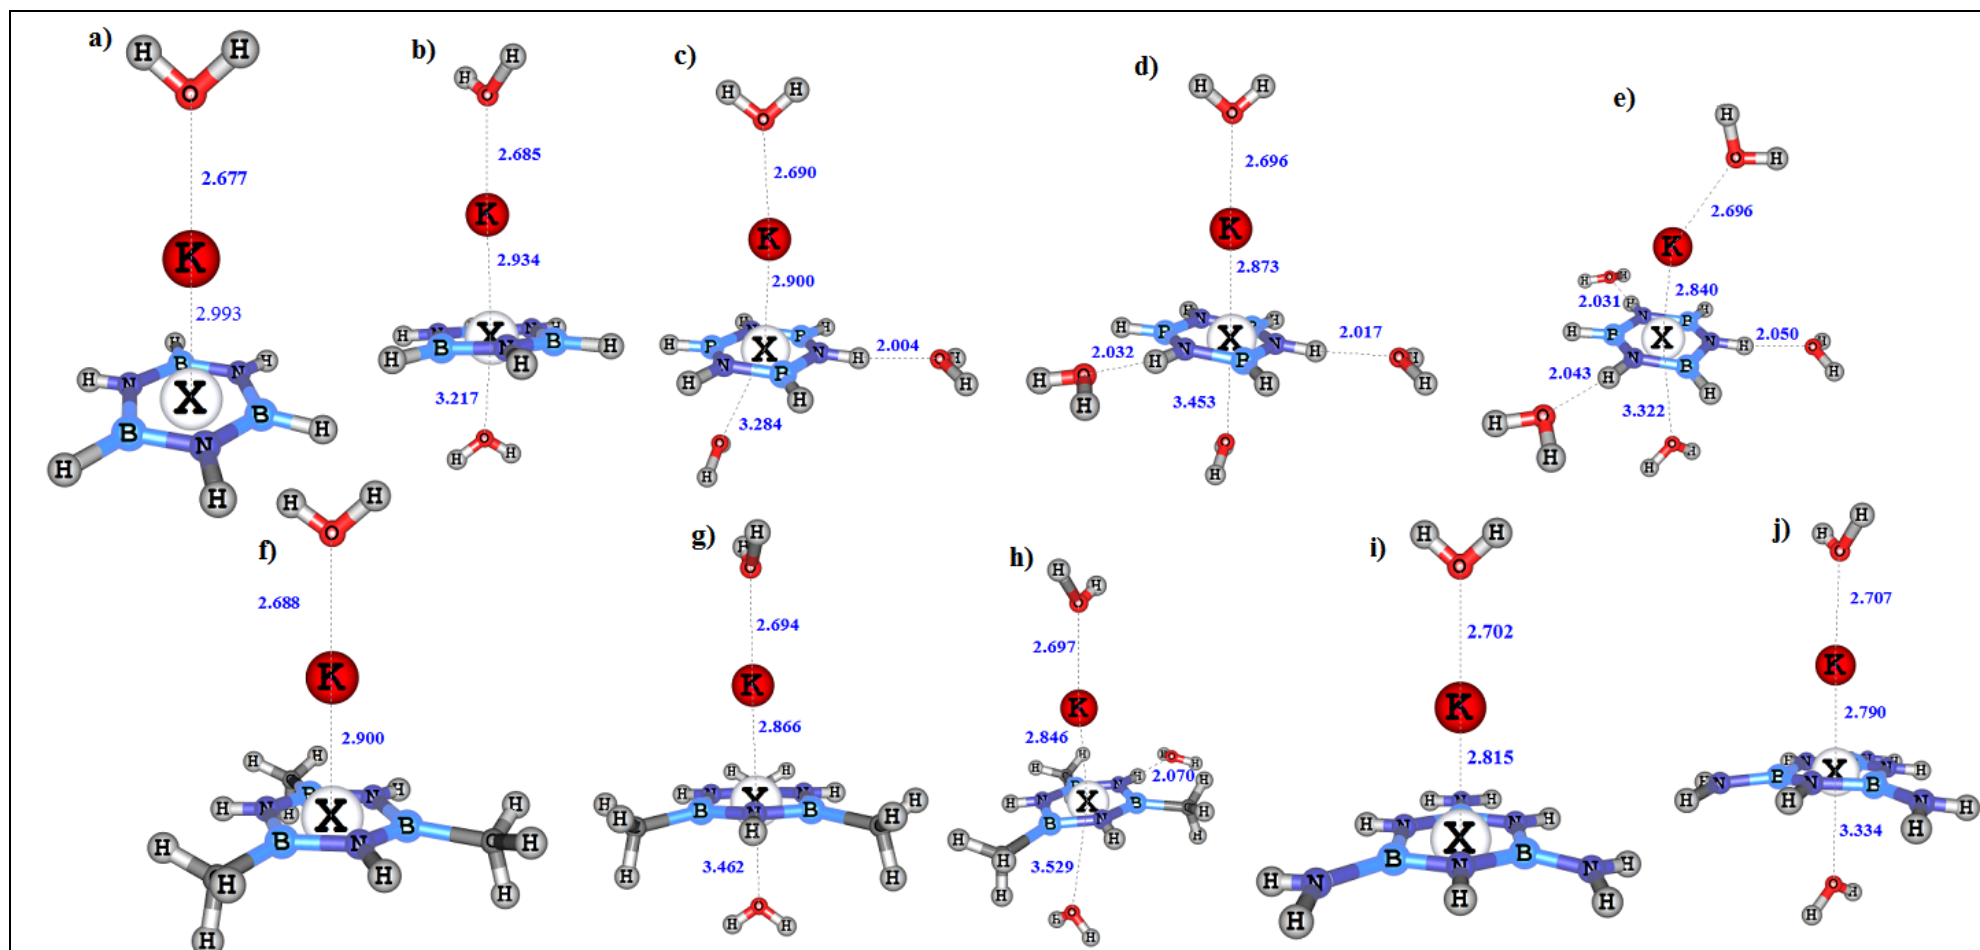

**Figure S5.** Optimized geometry of a) Borazine- $K^+-\pi-W$  b) Borazine- $K^+-\pi-2W$  c) Borazine- $K^+-\pi-3W$  d) Borazine- $K^+-\pi-4W$  e) Borazine- $K^+-\pi-5W$  f) Borazine  $(CH_3)_3-K^+-\pi-W$  g) Borazine  $(CH_3)_3-K^+-\pi-2W$  h) Borazine  $(CH_3)_3-K^+-\pi-2W$  i) Borazine  $(NH_2)_3-K^+-\pi-W$  j) Borazine  $(NH_2)_3-K^+-\pi-2W$ .

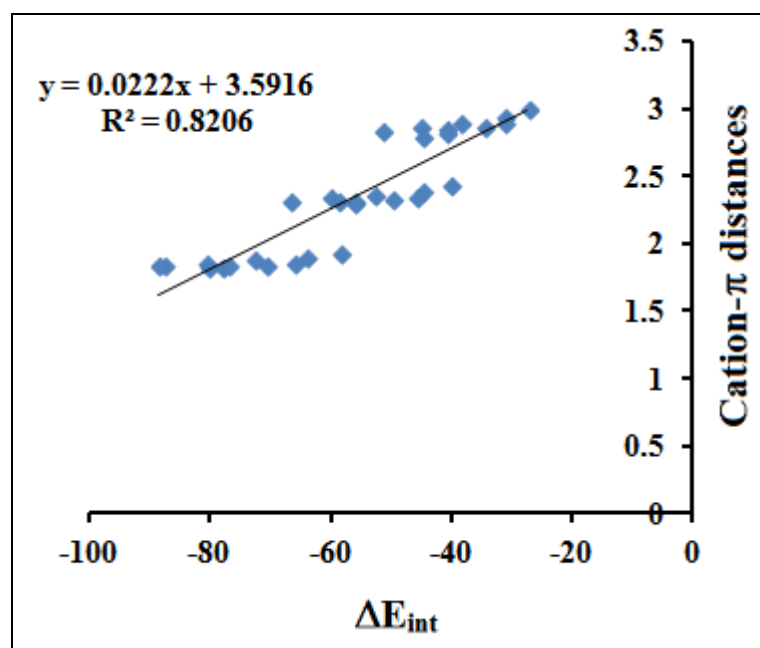

**Figure S6.** Correlation plot between interaction energies (x-axis) with cation- $\pi$  distance (y-axis) (Table 7).

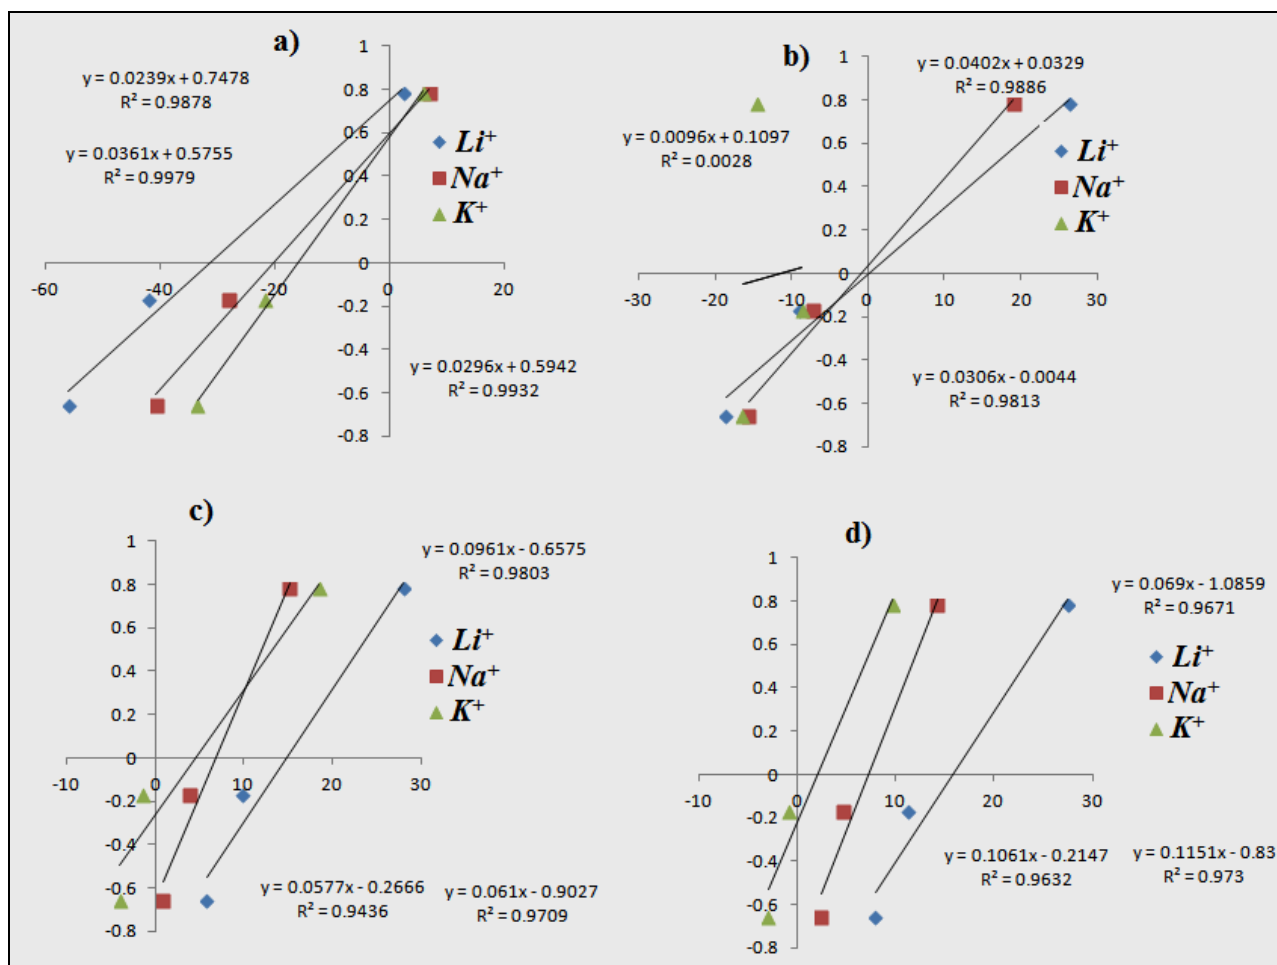

**Figure S7.** Correlation plot between interaction energies (x-axis) of various substituted cation- $\pi$  complexes of borazine (Table 5) and Hammett constant ( $\sigma_p$ , y-axis) in a) gas phase b) in benzene medium c) in acetone medium and d) in water medium.

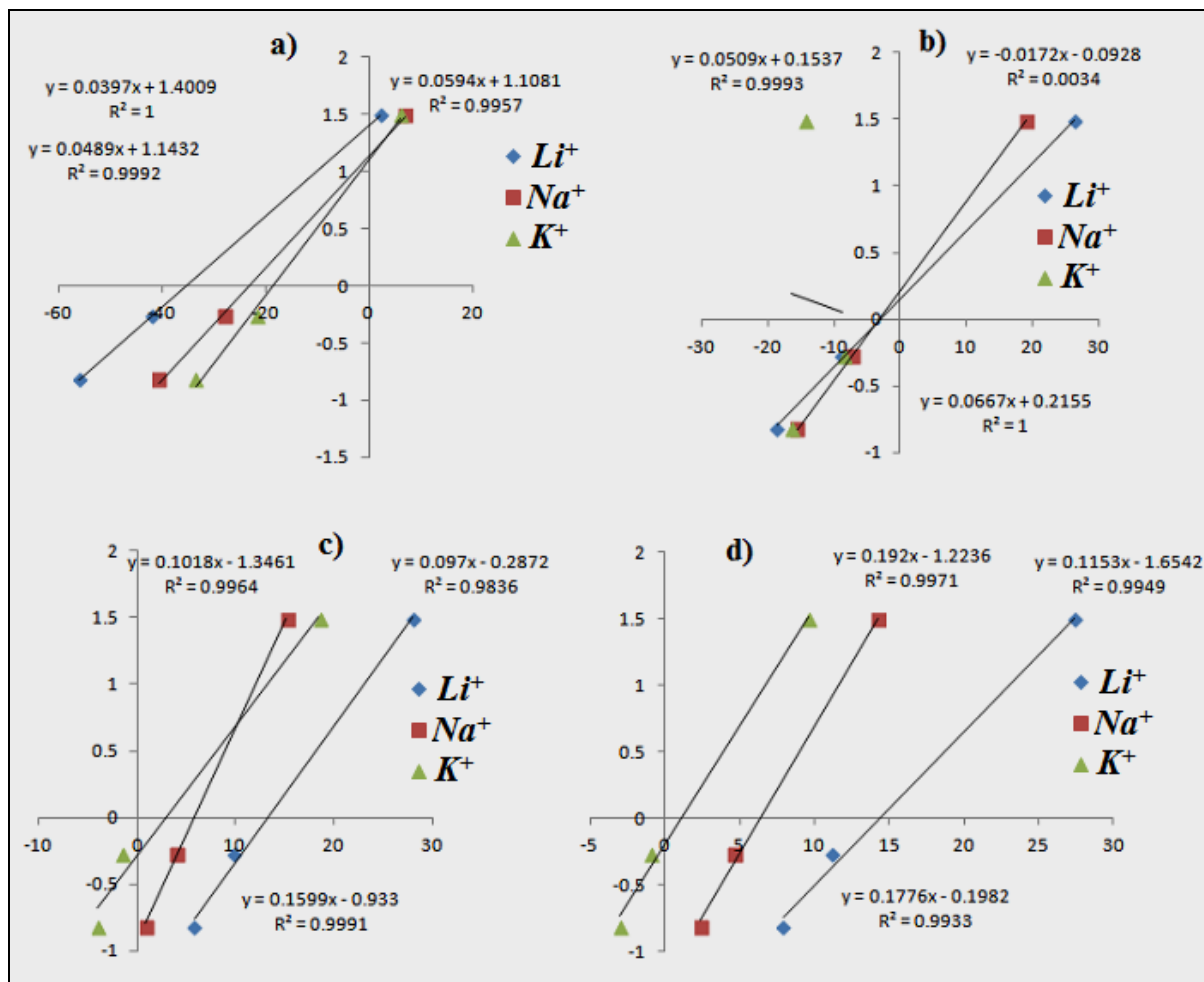

**Figure S8.** Correlation plot between interaction energies (X-axis) of various substituted cation- $\pi$  complexes of borazine (Table 5) and Hammett constant ( $\sigma_{Total} = (\Sigma\sigma_m + \Sigma\sigma_p)$ ), y-axis) in a) gas phase b) in benzene medium c) in acetone medium and d) in water medium.
